# Supplementary material for: Expression of ACE2, the SARS-CoV-2 receptor, and TMPRSS2 in prostate epithelial cells
Source: PubMed Central journal article supplement — bioRxiv. 2020 Apr 25:2020.04.24.056259. Preprint. [Version 2] doi: 10.1101/2020.04.24.056259 (PMC7263499; doi:10.1101/2020.04.24.056259), 2020-04-25
Supplement: NIHPP2020.04.24.056259-supplement-2.pdf [file NIHPP2020.04.24.056259-supplement-2.pdf]

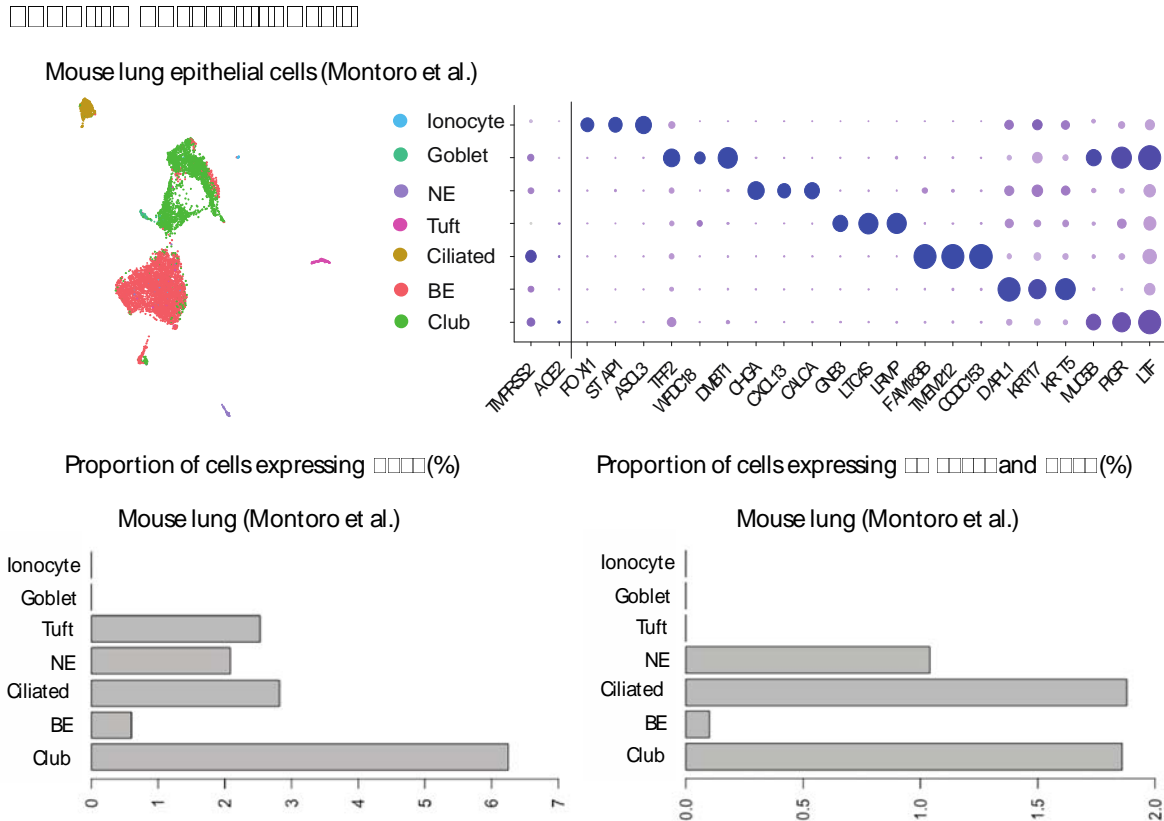

**Supplementary Figure 1.** Mouse lung epithelial cells distribution and the proportions of cells expressing *ACE2* and co-expressing of *TMPRSS2* and *ACE2* (%) from the Montoro study [6]. Each dataset was re-clustered and annotated by different cell types, for which distribution was shown in the Uniform Manifold Approximation and Projection (UMAP). A dot plot was generated showing the percentage of expression and average expression level for the most differentially expressed genes in each cell type as well as *ACE2* and *TMPRSS2*. The marker radius represents the percentage of expression and the color gradient represents the average expression level.

## Supplementary Figure 2

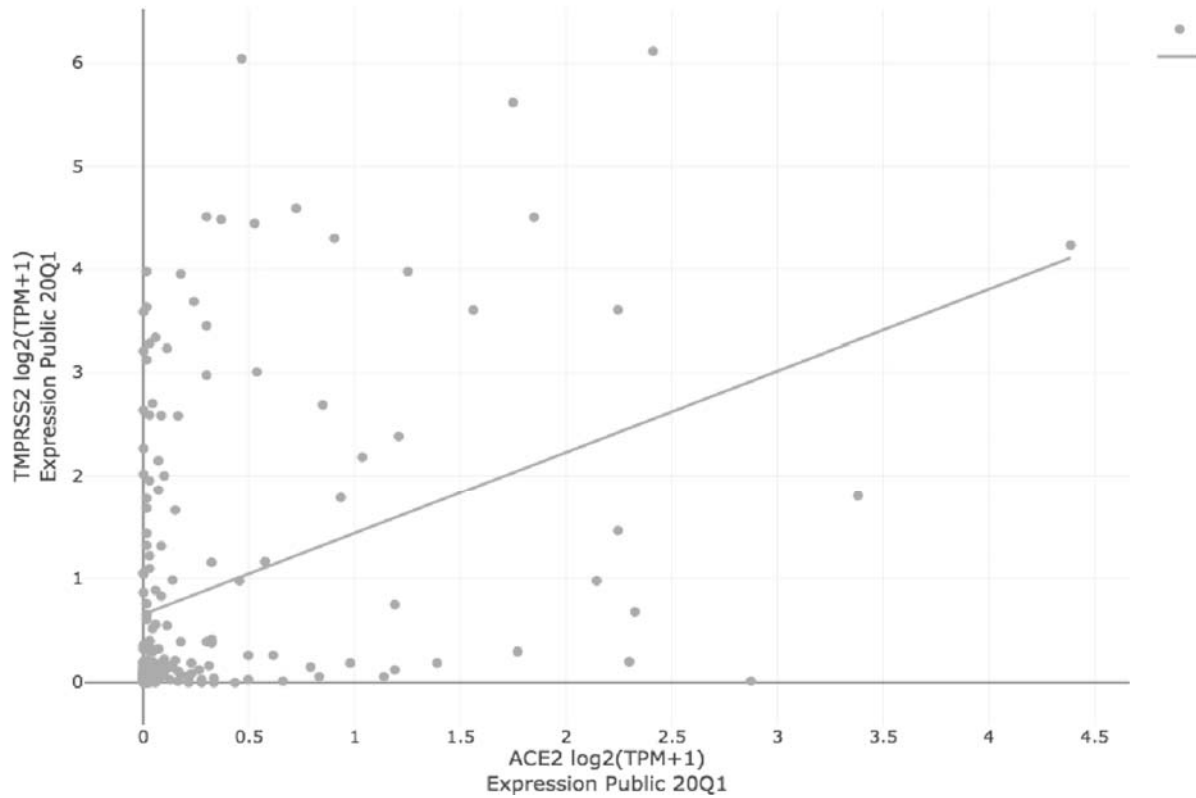

**Supplementary Figure 2.** Comparison of *TMPRSS2* and *ACE2* gene expression levels in human lung cancer cell lines (n=206) from the depmap.org portal; Pearson's correlation = 0.363;  $p = 8.16 \times 10^{-8}$  (linear regression).
